# Supplementary material for: Association between Intake of Fermented Dairy Product and Diet Quality, Health Beliefs in a Representative Sample of Polish Population
Source: MDPI journal article supplement (doi:10.3390/nu14235018), 2022-11-25
Supplement: s1 [file s1]

# Supplementary materials

## Association between intake of fermented dairy product and diet quality, health beliefs in a representative sample of Polish population

**Anna Danielewicz<sup>1\*</sup>, Jakub Morze<sup>1,2</sup>, Katarzyna Staniewska<sup>3</sup>, Aneta Dąbrowska<sup>4</sup>, Zhennai Yang<sup>5</sup>, Maria Baranowska<sup>4</sup>, Małgorzata Darewicz<sup>6</sup>, Justyna Żulewska<sup>4</sup>, Bogusław Staniewski<sup>4</sup>, Katarzyna E. Przybyłowicz<sup>1\*</sup>,**

<sup>1</sup> Department of Human Nutrition, University of Warmia and Mazury in Olsztyn, Poland

<sup>2</sup> Department of Cardiology and Internal Diseases, University of Warmia and Mazury in Olsztyn, Poland

<sup>3</sup> Department of Commodity Science and Food Analysis, University of Warmia and Mazury in Olsztyn, Poland

<sup>4</sup> Department of Dairy Science and Quality Management, University of Warmia and Mazury in Olsztyn, Poland

<sup>5</sup> Beijing Advanced Innovation Center for Food Nutrition and Human Health, Beijing Engineering and Technology Research Center of Food Additives, Beijing Technology and Business University, Beijing, P.R. China 100048

<sup>6</sup> Chair of Food Biochemistry, University of Warmia and Mazury in Olsztyn, Poland

**Table S1.** Association between MEDAS, its components and total fermented dairy products consumption.

|                               | Total fermented dairy products consumption |            |            |             |            | $P_{\text{trend}}$ |
|-------------------------------|--------------------------------------------|------------|------------|-------------|------------|--------------------|
|                               | Q1                                         | Q2         | Q3         | Q4          | Q5         |                    |
| MEDAS                         | 6 (4; 7)                                   | 6 (5; 7)   | 6 (5; 7)   | 6 (5; 7)    | 6 (5; 8)   | <0.001             |
| Plant oils as main (yes)†     | 73.1 (225)                                 | 83.5 (293) | 86.4 (274) | 87.18 (272) | 83.1 (338) | <0.001             |
| Plant oils, times/d           | 1 (1; 2)                                   | 1 (1; 2)   | 1 (1; 3)   | 2 (1; 2)    | 2 (1; 3)   | <0.001             |
| Vegetables, times/d           | 2 (1; 3)                                   | 2 (1; 3)   | 2 (1; 2.5) | 2 (1; 3)    | 2 (2; 4)   | <0.001             |
| Fruits and juices, times/d    | 4 (2; 7)                                   | 5 (3; 7)   | 6 (3; 8)   | 5 (3; 7)    | 5 (3; 7)   | 0.075              |
| Red meat, times/d             | 3 (2; 5)                                   | 3 (2; 4)   | 3 (2; 5)   | 3 (2; 5)    | 3 (2; 5)   | <0.001             |
| Butter and cream, times/d     | 2 (1; 3)                                   | 2 (1; 3)   | 2 (1; 3)   | 2 (2; 3)    | 2 (2; 3)   | 0.003              |
| Sweetened beverages, times/d  | 2 (0; 4)                                   | 2.5 (0; 5) | 3 (1; 5.5) | 2 (0; 4)    | 3 (1; 5)   | <0.001             |
| Wine, times/wk                | 0 (0; 0.5)                                 | 0 (0; 1)   | 0 (0; 1)   | 0 (0; 1)    | 1 (0; 3)   | <0.001             |
| Legumes, times/wk             | 1 (0; 1)                                   | 1 (0; 2)   | 1 (0; 2)   | 1 (1; 2)    | 2 (1; 3)   | <0.001             |
| Fish and seafood, times/wk    | 1 (0; 1)                                   | 1 (1; 2)   | 1 (1; 2)   | 1 (1; 2)    | 1 (1; 3)   | <0.001             |
| Sweets and pastries, times/wk | 3 (2; 4)                                   | 3 (2; 5)   | 3 (2; 5)   | 3 (2; 5)    | 4 (2; 6)   | <0.001             |
| Nuts, times/wk                | 0 (0; 1)                                   | 0 (0; 1)   | 0 (0; 2)   | 1 (0; 2)    | 1 (0; 2)   | <0.001             |
| Preferable white meat (yes)†  | 71.4 (220)                                 | 75.2 (264) | 73.2 (232) | 79.8 (249)  | 80.6 (328) | 0.015              |
| Whole grain products, times/d | 2 (1; 3)                                   | 2 (1; 3)   | 2 (1; 3)   | 2 (1; 4)    | 2 (1.5; 3) | 0.019              |

Data are presented as median and interquartile range (IQR) or (where†) as % and number. The sample size may vary slightly in each variable due to missing data. MEDAS, MEDAS, Mediterranean Diet Adherence Screener.  $P$ -value <0.05: significance for Kruskal-Wallis test (Dunn's post-hoc test) or Pearson's chi square test.

**Table S2.** Association of health concern scale, health beliefs and diet quality with consumption of fermented products according to their subgroups.

|                    | Natural fermented dairy products | Flavoured fermented dairy products | Rennet cheese    |
|--------------------|----------------------------------|------------------------------------|------------------|
| HCS                | <b>0.158676</b>                  | <b>0.122644</b>                    | 0.042318         |
| Normal body weight | <b>0.086472</b>                  | <b>0.083768</b>                    | <b>0.049415</b>  |
| Heart health       | <b>0.169006</b>                  | <b>0.188995</b>                    | <b>0.106801</b>  |
| Bone health        | <b>0.088887</b>                  | <b>0.053926</b>                    | <b>0.054818</b>  |
| Immune defence     | <b>0.124786</b>                  | <b>0.134883</b>                    | 0.037514         |
| Digestive health   | 0.031016                         | 0.003205                           | 0.018248         |
| Dental health      | <b>0.048255</b>                  | 0.035988                           | 0.045201         |
| No benefits        | <b>-0.187648</b>                 | <b>-0.235776</b>                   | <b>-0.154978</b> |
| MEDAS              | <b>0.169951</b>                  | <b>0.133693</b>                    | 0.016360         |

Data are presented as regression coefficient. HSC, health concern scale. N=1695. MEDAS, Mediterranean Diet Adherence Screener. Bolded are coefficients at  $p < 0.05$  (Pearson's test)
